# Supplementary material
Source: publisher figshare collection journal article supplement (https://gsapubs.figshare.com/ndownloader/files/23298413)

Time-Temperature History

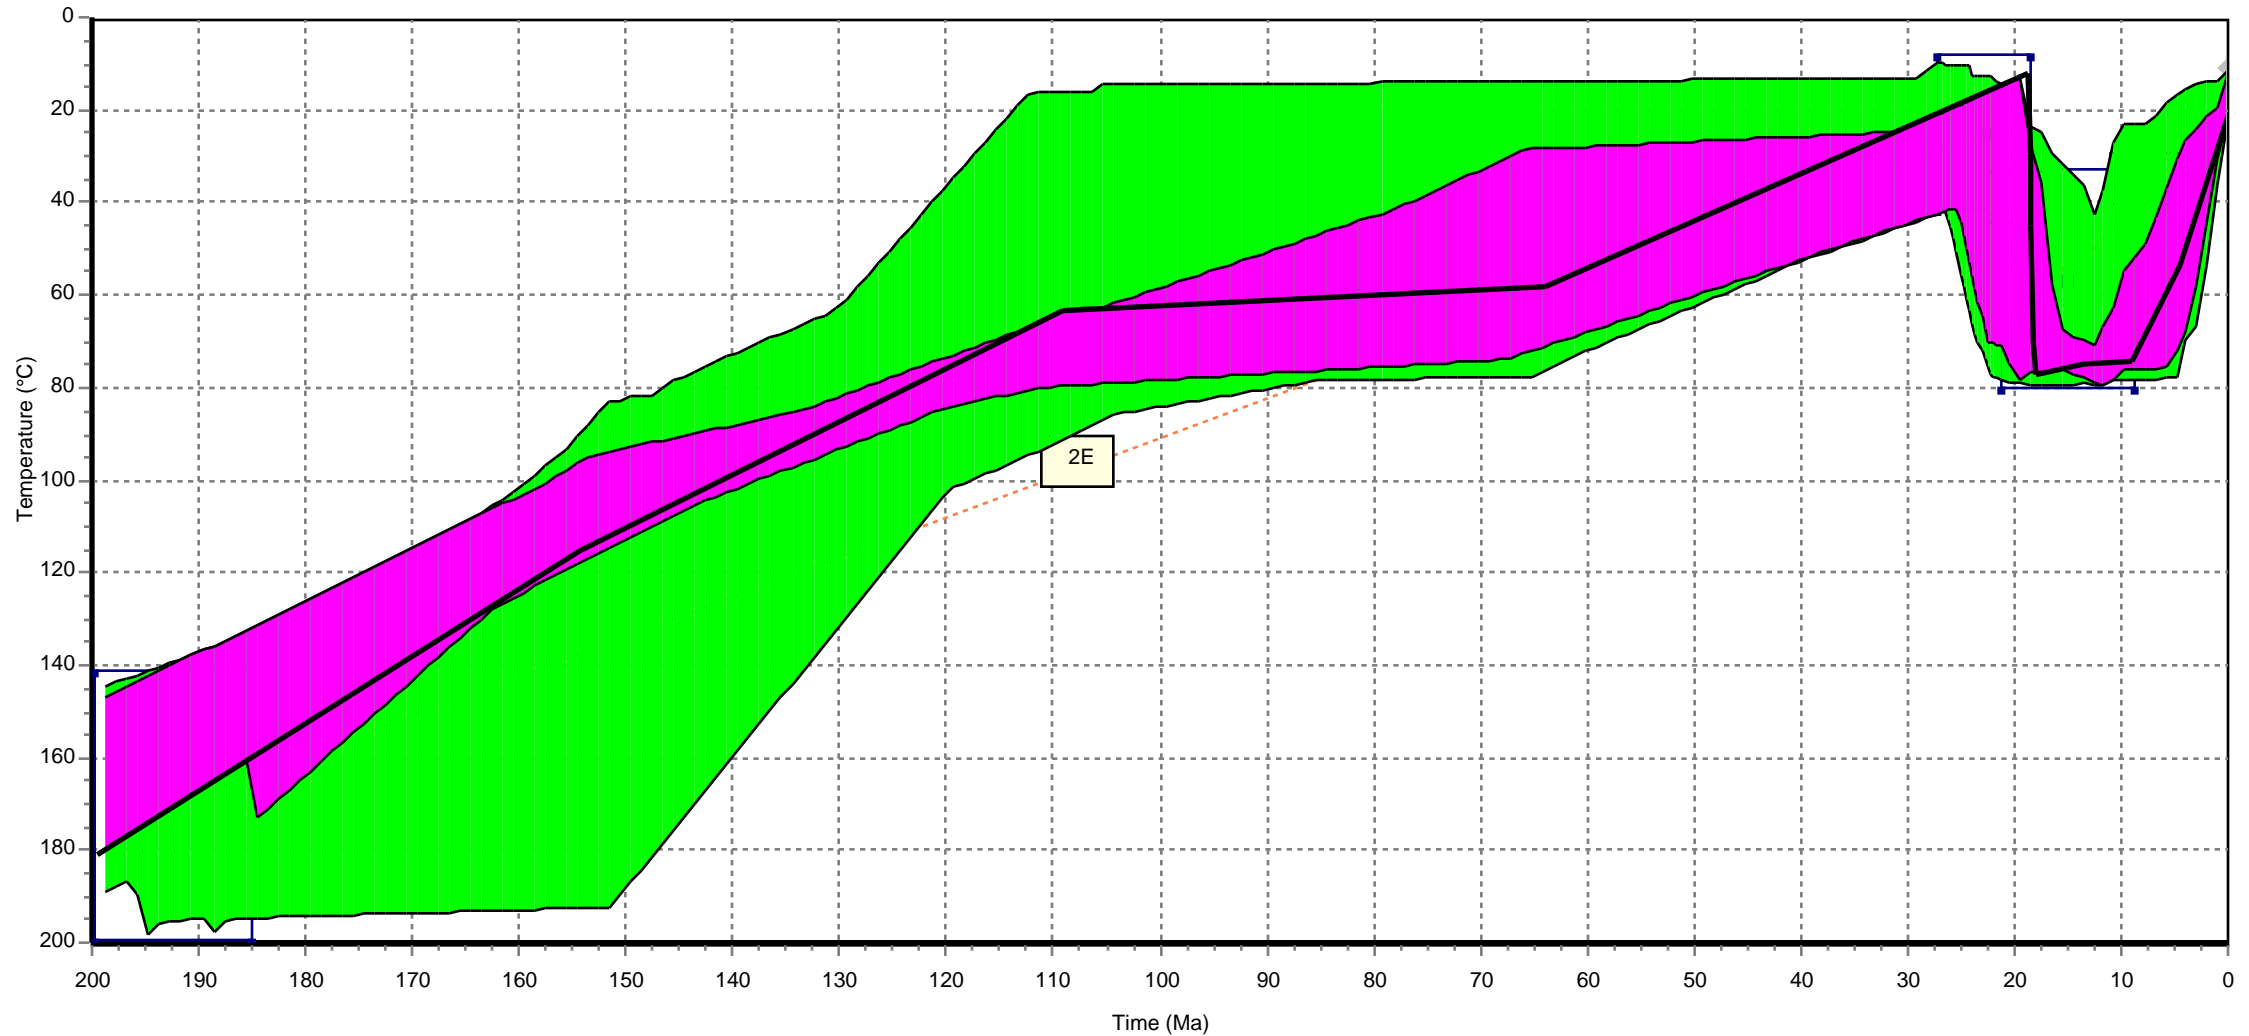

Supplement: Supplementary file 1 [file 23298413]
